# Supplementary material for: Systematic review of electronic health records to manage chronic conditions among displaced populations
Source: HighWire-hosted journal article supplement (doi:10.1136/bmjopen-2021-056987), 2022-09-01
Supplement: bmjopen-2021-056987supp001_data_supplement.pdf [file bmjopen-2021-056987supp001_data_supplement.pdf]

## PRISMA Checklist

| Section and Topic             | Item # | Checklist item                                                                                                                                                                                                                                                                                       | Location where item is reported           |
|-------------------------------|--------|------------------------------------------------------------------------------------------------------------------------------------------------------------------------------------------------------------------------------------------------------------------------------------------------------|-------------------------------------------|
| <b>TITLE</b>                  |        |                                                                                                                                                                                                                                                                                                      |                                           |
| Title                         | 1      | Identify the report as a systematic review.                                                                                                                                                                                                                                                          | Pg 1                                      |
| <b>ABSTRACT</b>               |        |                                                                                                                                                                                                                                                                                                      |                                           |
| Abstract                      | 2      | See the PRISMA 2020 for Abstracts checklist.                                                                                                                                                                                                                                                         | Pg 2                                      |
| <b>INTRODUCTION</b>           |        |                                                                                                                                                                                                                                                                                                      |                                           |
| Rationale                     | 3      | Describe the rationale for the review in the context of existing knowledge.                                                                                                                                                                                                                          | Pg 4 (2 <sup>nd</sup> paragraph of Intro) |
| Objectives                    | 4      | Provide an explicit statement of the objective(s) or question(s) the review addresses.                                                                                                                                                                                                               | Pg 4 (last paragraph of intro)            |
| <b>METHODS</b>                |        |                                                                                                                                                                                                                                                                                                      |                                           |
| Eligibility criteria          | 5      | Specify the inclusion and exclusion criteria for the review and how studies were grouped for the syntheses.                                                                                                                                                                                          | Pg 5 (selection of studies)               |
| Information sources           | 6      | Specify all databases, registers, websites, organisations, reference lists and other sources searched or consulted to identify studies. Specify the date when each source was last searched or consulted.                                                                                            | Pg 4 (search strategy) + Appendix 2       |
| Search strategy               | 7      | Present the full search strategies for all databases, registers and websites, including any filters and limits used.                                                                                                                                                                                 |                                           |
| Selection process             | 8      | Specify the methods used to decide whether a study met the inclusion criteria of the review, including how many reviewers screened each record and each report retrieved, whether they worked independently, and if applicable, details of automation tools used in the process.                     | Pg 5 (selection of studies)               |
| Data collection process       | 9      | Specify the methods used to collect data from reports, including how many reviewers collected data from each report, whether they worked independently, any processes for obtaining or confirming data from study investigators, and if applicable, details of automation tools used in the process. | Pg 5 (data extraction)                    |
| Data items                    | 10a    | List and define all outcomes for which data were sought. Specify whether all results that were compatible with each outcome domain in each study were sought (e.g. for all measures, time points, analyses), and if not, the methods used to decide which results to collect.                        | Pg 5 (data extraction)                    |
|                               | 10b    | List and define all other variables for which data were sought (e.g. participant and intervention characteristics, funding sources). Describe any assumptions made about any missing or unclear information.                                                                                         | Pg 5 (data extraction)                    |
| Study risk of bias assessment | 11     | Specify the methods used to assess risk of bias in the included studies, including details of the tool(s) used, how many reviewers assessed each study and whether they worked independently, and if applicable, details of automation tools used in the process.                                    | Pg 5 (critical appraisal)                 |
| Effect measures               | 12     | Specify for each outcome the effect measure(s) (e.g. risk ratio, mean difference) used in the synthesis or presentation of results.                                                                                                                                                                  | N/A                                       |
| Synthesis methods             | 13a    | Describe the processes used to decide which studies were eligible for each synthesis (e.g. tabulating the study intervention characteristics and comparing against the planned groups for each synthesis (item #5)).                                                                                 | Pg 5 (data synthesis)                     |

| Section and Topic             | Item # | Checklist item                                                                                                                                                                                                                                                                       | Location where item is reported        |
|-------------------------------|--------|--------------------------------------------------------------------------------------------------------------------------------------------------------------------------------------------------------------------------------------------------------------------------------------|----------------------------------------|
|                               | 13b    | Describe any methods required to prepare the data for presentation or synthesis, such as handling of missing summary statistics, or data conversions.                                                                                                                                | N/A                                    |
|                               | 13c    | Describe any methods used to tabulate or visually display results of individual studies and syntheses.                                                                                                                                                                               | N/A                                    |
|                               | 13d    | Describe any methods used to synthesize results and provide a rationale for the choice(s). If meta-analysis was performed, describe the model(s), method(s) to identify the presence and extent of statistical heterogeneity, and software package(s) used.                          | Pg 5 (synthesis of results)            |
|                               | 13e    | Describe any methods used to explore possible causes of heterogeneity among study results (e.g. subgroup analysis, meta-regression).                                                                                                                                                 | N/A                                    |
|                               | 13f    | Describe any sensitivity analyses conducted to assess robustness of the synthesized results.                                                                                                                                                                                         | N/A                                    |
| Reporting bias assessment     | 14     | Describe any methods used to assess risk of bias due to missing results in a synthesis (arising from reporting biases).                                                                                                                                                              | N/A                                    |
| Certainty assessment          | 15     | Describe any methods used to assess certainty (or confidence) in the body of evidence for an outcome.                                                                                                                                                                                | N/A                                    |
| <b>RESULTS</b>                |        |                                                                                                                                                                                                                                                                                      |                                        |
| Study selection               | 16a    | Describe the results of the search and selection process, from the number of records identified in the search to the number of studies included in the review, ideally using a flow diagram.                                                                                         | Pg 5 (description of included studies) |
|                               | 16b    | Cite studies that might appear to meet the inclusion criteria, but which were excluded, and explain why they were excluded.                                                                                                                                                          | N/A                                    |
| Study characteristics         | 17     | Cite each included study and present its characteristics.                                                                                                                                                                                                                            | Pgs 6-8 (Table 1)                      |
| Risk of bias in studies       | 18     | Present assessments of risk of bias for each included study.                                                                                                                                                                                                                         | Appendix 3                             |
| Results of individual studies | 19     | For all outcomes, present, for each study: (a) summary statistics for each group (where appropriate) and (b) an effect estimate and its precision (e.g. confidence/credible interval), ideally using structured tables or plots.                                                     | N/A                                    |
| Results of syntheses          | 20a    | For each synthesis, briefly summarise the characteristics and risk of bias among contributing studies.                                                                                                                                                                               | N/A                                    |
|                               | 20b    | Present results of all statistical syntheses conducted. If meta-analysis was done, present for each the summary estimate and its precision (e.g. confidence/credible interval) and measures of statistical heterogeneity. If comparing groups, describe the direction of the effect. | N/A                                    |
|                               | 20c    | Present results of all investigations of possible causes of heterogeneity among study results.                                                                                                                                                                                       | N/A                                    |
|                               | 20d    | Present results of all sensitivity analyses conducted to assess the robustness of the synthesized results.                                                                                                                                                                           | N/A                                    |
| Reporting biases              | 21     | Present assessments of risk of bias due to missing results (arising from reporting biases) for each synthesis assessed.                                                                                                                                                              | N/A                                    |
| Certainty of evidence         | 22     | Present assessments of certainty (or confidence) in the body of evidence for each outcome assessed.                                                                                                                                                                                  | N/A                                    |
| <b>DISCUSSION</b>             |        |                                                                                                                                                                                                                                                                                      |                                        |
| Discussion                    | 23a    | Provide a general interpretation of the results in the context of                                                                                                                                                                                                                    | Pgs 12-13                              |

| Section and Topic                              | Item # | Checklist item                                                                                                                                                                                                                             | Location where item is reported     |
|------------------------------------------------|--------|--------------------------------------------------------------------------------------------------------------------------------------------------------------------------------------------------------------------------------------------|-------------------------------------|
|                                                |        | other evidence.                                                                                                                                                                                                                            | (discussion)                        |
|                                                | 23b    | Discuss any limitations of the evidence included in the review.                                                                                                                                                                            | Pg 13 (limitations)                 |
|                                                | 23c    | Discuss any limitations of the review processes used.                                                                                                                                                                                      | Pg 13 (limitations)                 |
|                                                | 23d    | Discuss implications of the results for practice, policy, and future research.                                                                                                                                                             | Pgs 12-13 (discussion & conclusion) |
| <b>OTHER INFORMATION</b>                       |        |                                                                                                                                                                                                                                            |                                     |
| Registration and protocol                      | 24a    | Provide registration information for the review, including register name and registration number, or state that the review was not registered.                                                                                             | N/A                                 |
|                                                | 24b    | Indicate where the review protocol can be accessed, or state that a protocol was not prepared.                                                                                                                                             | N/A                                 |
|                                                | 24c    | Describe and explain any amendments to information provided at registration or in the protocol.                                                                                                                                            | N/A                                 |
| Support                                        | 25     | Describe sources of financial or non-financial support for the review, and the role of the funders or sponsors in the review.                                                                                                              | Pg 14                               |
| Competing interests                            | 26     | Declare any competing interests of review authors.                                                                                                                                                                                         | Pg 14                               |
| Availability of data, code and other materials | 27     | Report which of the following are publicly available and where they can be found: template data collection forms; data extracted from included studies; data used for all analyses; analytic code; any other materials used in the review. | N/A                                 |

From: Page MJ, McKenzie JE, Bossuyt PM, Boutron I, Hoffmann TC, Mulrow CD, et al. The PRISMA 2020 statement: an updated guideline for reporting systematic reviews. *BMJ* 2021;372:n71. doi: 10.1136/bmj.n71

For more information, visit: <http://www.prisma-statement.org/>

## Appendix 2: Search Strategy

### Ovid

Database(s): APA PsycInfo 1806 to April Week 1 2021, EBM Reviews - Cochrane Central Register of Controlled Trials March 2021, EBM Reviews - Cochrane Database of Systematic Reviews 2005 to April 8, 2021, EBM Reviews - Health Technology Assessment 4th Quarter 2016, Embase 1974 to 2021 April 09 , Ovid MEDLINE(R) and Epub Ahead of Print, In-Process, In-Data-Review & Other Non-Indexed Citations and Daily 1946 to April 09, 2021

#### Search Strategy:

| # | Searches                                                                                                                                                                                                                                                                                             | Results |
|---|------------------------------------------------------------------------------------------------------------------------------------------------------------------------------------------------------------------------------------------------------------------------------------------------------|---------|
| 1 | exp Refugees/                                                                                                                                                                                                                                                                                        | 32123   |
| 2 | ((asylum adj3 seek*) or "displaced people" or "displaced person*" or refugee* or "stateless people" or "stateless person*").ti,ab,hw,kw.                                                                                                                                                             | 45095   |
| 3 | 1 or 2                                                                                                                                                                                                                                                                                               | 45095   |
| 4 | exp Electronic Health Records/                                                                                                                                                                                                                                                                       | 46211   |
| 5 | exp Medical Records Systems, Computerized/<br>(((("Computer-based" or computerized or "Computer-stored" or Electronic) adj2 ("Medical Record" or "Medical Records" or "Patient Record" or "Patient Records" or "Health Record" or "Health Records" or "Order Entry" or "Order Entries"))) or ehealth | 44939   |
| 6 | or "E-Health" or EHR or "electronic health" or EMR or "health information exchange*" or "medical information exchange*" or mhealth or "M-Health" or "Mobile health" or "Physician Order Entries" or "Physician Order Entry").ti,ab,hw,kw.                                                            | 238166  |
| 7 | 4 or 5 or 6                                                                                                                                                                                                                                                                                          | 239595  |
| 8 | 3 and 7                                                                                                                                                                                                                                                                                              | 271     |
| 9 | remove duplicates from 8                                                                                                                                                                                                                                                                             | 187     |

Scopus

- 1 TITLE-ABS-KEY((asylum W/3 seek\*) OR "displaced people" OR "displaced person\*" OR refugee\* OR "stateless people" OR "stateless person\*")
- 2 TITLE-ABS-KEY(("Computer-based" or computerized or "Computer-stored" or Electronic) W/2 ("Medical Record" or "Medical Records" or "Patient Record" or "Patient Records" or "Health Record" or "Health Records" or "Order Entry" or "Order Entries")) OR ehealth OR "E-Health" OR EHR OR "electronic health" OR EMR OR "health information exchange\*" OR "medical information exchange\*" OR mhealth OR "M-Health" OR "Mobile health" OR "Physician Order Entries" OR "Physician Order Entry")
- 3 1 and 2
- 4 INDEX(embase) OR INDEX(medline) OR PMID(0\* OR 1\* OR 2\* OR 3\* OR 4\* OR 5\* OR 6\* OR 7\* OR 8\* OR 9\*)
- 5 3 and not 4

CINAHL

- 1 (MM "Refugee Camps") OR (MM "Refugees")
- 2 ((asylum N3 seek\*) or "displaced people" or "displaced person\*" or refugee\* or "stateless people" or "stateless person\*")
- 3 1 or 2
- 4 (MH "Electronic Health Records+")
- 5 (((("Computer-based" or computerized or "Computer-stored" or Electronic) N2 ("Medical Record" or "Medical Records" or "Patient Record" or "Patient Records" or "Health Record" or "Health Records" or "Order Entry" or "Order Entries")) or ehealth or "E-Health" or EHR or "electronic health" or EMR or "health information exchange\*" or "medical information exchange\*" or mhealth or "M-Health" or "Mobile health" or "Physician Order Entries" or "Physician Order Entry")
- 6 4 or 5
- 7 3 and 6

## Appendix 3 – Critical Appraisal

### Modified Newcastle-Ottawa tool for Cohort and Case Control Studies

1. Risk of bias due to loss to follow-up? (drop outs, withdrawals and patients who lack follow-up data)
2. Was there any reporting bias due to selective outcome reporting?
3. Important imbalances at baseline (in terms of the two comparative groups of patients)?
4. Source of study funding
5. The study subjects were recruited in a consecutive manner and are representative of the whole experience of the study center?
6. Study ascertained what medical conditions patients had from a reliable and credible source (such as medical records, or the study followed patients to see what medical conditions they had) versus from a less reliable source (ICD-9 codes for example).
7. Comparability of cohorts on the basis of the design or analysis, if applicable (Were there methods described to control for confounding? (e.g. appropriate study design and/or statistical methods described which would attempt to control for confounding—such as matching or logistic regression))
8. Assessment of outcome (were the methods used to assess for the presence of the outcomes credible and reliable?)
9. Was study follow up long enough for outcomes to occur?
10. Adequacy of follow up of cohorts (was there significant loss to follow-up?)
11. Authors' conflict of interest and funding sources?
12. Is the qualitative methodology appropriate?
13. Was the recruitment strategy appropriate to the aims of this study?
14. Was the data collected in a way that addressed the research issue?
15. Has the relationship between the researchers and participants been adequately considered?
16. Have ethical issues been taken into consideration?
17. Was the data analysis sufficiently rigorous?

| Study ID (author, year)           | Follow up                                                            | Outcome reporting | Baseline imbalances                                                                                  | Source of study funding                            | Study subjects | Exposure ascertain ment | Compar ability | Outcome assessment | Follow up time | Adequate follow up | Conflict of interest | Qualitative methods | Recruit ment strategy | Data collection | Researcher relationship | Ethical issues | Data analysis |
|-----------------------------------|----------------------------------------------------------------------|-------------------|------------------------------------------------------------------------------------------------------|----------------------------------------------------|----------------|-------------------------|----------------|--------------------|----------------|--------------------|----------------------|---------------------|-----------------------|-----------------|-------------------------|----------------|---------------|
| <i>Doocy, et al 2017</i>          | Yes, but response rate was enough to detect change                   | Yes               | No                                                                                                   | Research for Health in Humanitarian Crisis (R2HC). | Unclear        | Yes                     | N/A            | Yes                | Yes            | No                 | No                   | Yes                 | Yes                   | Yes             | Unclear                 | Yes            | Yes           |
| <i>Berkowitz et al, 2016</i>      | Yes. Refugees had shorter follow up.                                 | No                | Yes. Difference in baseline BMI, baseline diabetes, difference in education, difference in insurance | Unknown                                            | Yes            | Yes                     | Yes            | Yes                | Yes            | Yes                | No conflict          | N/A                 | Yes                   | Yes             |                         | Yes            | Yes           |
| <i>Khader, et al 2013</i>         | Yes. large loss to follow up (males significantly more than females) | No                | Yes. differences in male and female participants (almost across the board)                           | Unknown                                            | Yes            | Yes                     | No             | Yes                | Yes            | Yes                | No conflict          | N/A                 | Yes                   | Yes             | Yes                     | Yes            | Yes           |
| <i>Khader, Ballout et al 2014</i> | 10% lost to follow up after 1 year                                   | No                | Yes, more males, more under 60yo, more patients with                                                 | Unknown                                            | Yes            | Yes                     | No             | Yes                | Yes            | Yes                | No conflict          | N/A                 | Yes                   | Yes             | Yes                     | Yes            | Yes           |

|                                   |                                                     |     |                                                                                                        |                                                                          |                                                           |     |             |                              |     |                        |             |     |     |     |     |     |     |                                          |
|-----------------------------------|-----------------------------------------------------|-----|--------------------------------------------------------------------------------------------------------|--------------------------------------------------------------------------|-----------------------------------------------------------|-----|-------------|------------------------------|-----|------------------------|-------------|-----|-----|-----|-----|-----|-----|------------------------------------------|
|                                   |                                                     |     | diabetes control undetermined, more patients with poor diabetes control who failed to return to clinic |                                                                          |                                                           |     |             |                              |     |                        |             |     |     |     |     |     |     |                                          |
| <i>Khader, Ballout et al 2014</i> | Yes. About 30% over 36 months lost to follow up     | No  | N/A                                                                                                    | Unknown                                                                  | Yes                                                       | Yes | N/A         | Yes                          | Yes | Yes                    | Unknown     | N/A | Yes | Yes | Yes | Yes | Yes | No. They did not have comparison group   |
| <i>Khader et al., 2012</i>        | No                                                  | No  | N/A                                                                                                    | Unknown                                                                  | Yes                                                       | Yes | N/A         | Yes                          | Yes | No                     | Unknown     | N/A | Yes | Yes | Yes | Yes | Yes | No. They did not have comparison group   |
| <i>Khader et al., 2012</i>        | No                                                  | No  | N/A                                                                                                    | Unknown                                                                  | Yes                                                       | Yes | N/A         | Yes                          | Yes | No                     | Unknown     | N/A | Yes | Yes | Yes | Yes | Yes | No. They did not have comparison group   |
| <i>Doocy et al, 2017</i>          | Yes, 77.75% of participants finished study          | No  | N/A (longitudinal cohort)                                                                              | Research for Health in Humanitarian Crisis (R2HC).                       | No, excluded those without HT or DM diagnosis or under 40 | Yes | N/A         | No (self-reported adherence) | Yes | 77.75% completed study | No conflict | Yes | Yes | Yes | Yes | Yes | Yes | No. They did not have comparison group   |
| <i>Doocy et al., 2018</i>         | Yes, 78% of participants finished study             | No  | N/A (longitudinal cohort)                                                                              | Research for Health in Humanitarian Crisis (R2HC)                        | No, excluded those without HT or DM diagnosis or under 40 | Yes | N/A         | No (self-reported adherence) | Yes | 78% completed study    | No conflict | N/A | Yes | Yes | Yes | Yes | Yes | No. They did not have a comparison group |
| <i>Shapiro, 2016</i>              | Yes, 33 of 129 (25.6%) excluded due to no follow-up | No  | No                                                                                                     | Unknown                                                                  | Yes                                                       | Yes | N/A         | Yes                          | Yes | Yes                    | No conflict | N/A | Yes | Yes | Yes | Yes | Yes | No. They did not have comparison group   |
| <i>Skoberg, 2019</i>              | TBD                                                 | TBD | TBD                                                                                                    | EU Asylum, Migration and Integration Fund, grant number SMDno-2016-1541. | Yes                                                       | No  | N/A         | Yes                          | TBD | TBD                    | No conflict | Yes | Yes | TBD | Yes | Yes | Yes | No. They did not have comparison group   |
| <i>Storck 2018</i>                | TBD                                                 | TBD | TBD                                                                                                    | Unknown                                                                  | Unclear                                                   | No  | N/A         | N/A                          | TBD | TBD                    | No conflict | N/A | N/A | TBD | Yes | Yes | Yes | No. They did not have comparison group   |
|                                   |                                                     |     |                                                                                                        |                                                                          |                                                           |     |             |                              |     |                        |             |     |     |     |     |     |     |                                          |
| <i>Njeru et al., 2017</i>         | Yes, unknown                                        | No  | Yes, more females,                                                                                     | Mayo Clinic                                                              | Yes                                                       | Yes | No controls | Yes                          | Yes | Unknown                | No conflict | Yes | Yes | Yes | Yes | Yes | Yes | Yes                                      |



|                            |                                    |    |                                             |                                       |                                                                  |                           |                                                                |                                                       |     |     |             |                                     |     |     |     |     |                                          |
|----------------------------|------------------------------------|----|---------------------------------------------|---------------------------------------|------------------------------------------------------------------|---------------------------|----------------------------------------------------------------|-------------------------------------------------------|-----|-----|-------------|-------------------------------------|-----|-----|-----|-----|------------------------------------------|
|                            | number excluded for lack of visits |    | younger, non-white                          | Kern Center and Primary Care Division |                                                                  |                           |                                                                |                                                       |     |     |             |                                     |     |     |     |     |                                          |
| <i>Olson et al., 2017</i>  | No                                 | No | No                                          | Unknown                               | Yes                                                              | Yes                       | Yes, controlled for age, sex, region, duration of US residence | Yes                                                   | Yes | No  | Unknown     | N/A                                 | Yes | Yes | Yes | Yes | Yes                                      |
| <i>Pohl et al., 2017</i>   | No                                 | No | N/A                                         | Unknown                               | Yes                                                              | Yes                       | N/A                                                            | Yes                                                   | N/A | N/A | No conflict | N/A                                 | Yes | Yes | Yes | Yes | No. They did not have comparison group   |
| <i>Wagner, 2014</i>        | No                                 | No | N/A                                         |                                       | Yes                                                              | Yes                       | Yes (controlled for age)                                       | Yes                                                   | Yes | Yes | No conflict | N/A                                 | Yes | Yes | Yes | Yes | No. They did not have comparison group   |
| <i>Waldof, 2014</i>        | No                                 | No | N/A                                         | Unknown                               | No, excluded all Spanish speaking patients and those without EMR | Yes                       | Yes                                                            | Yes                                                   | Yes | No  | No conflict | Yes                                 | Yes | Yes | Yes | Yes | No, they did not have a comparison group |
| <i>Walters, 2016</i>       | No                                 | No | N/A                                         | Unknown                               | No, some patients may have known about their HBV status          | Yes                       | N/A                                                            | No, used HBsAg which only indicates chronic infection | Yes | No  | No conflict | N/A                                 | Yes | Yes | Yes | Yes | Yes                                      |
| <i>Goodman, 2018</i>       | No                                 | No | N/A                                         | Unknown                               | No                                                               | No                        | Yes                                                            | N/A                                                   | N/A | No  | No conflict | N/A                                 | Yes | Yes | Yes | Yes | Yes                                      |
| <i>Goosen, 2015</i>        | No                                 | No | asylum seekers are more often younger males | Unknown                               | Yes                                                              | Yes                       | Yes                                                            | N/A                                                   | Yes | No  | No conflict | N/A                                 | Yes | Yes | Yes | Yes | Yes                                      |
| <i>Hanna, 2015</i>         | No                                 | No | N/A                                         | Unknown                               | Yes                                                              | Yes                       | No, didn't control for age/gender                              | N/A                                                   | Yes | No  | No conflict | N/A                                 | Yes | Yes | Yes | Yes | Yes (no comparison but cross-sectional)  |
| <i>Higgins, 2019</i>       | No                                 | No | N/A                                         | Unknown                               | Yes                                                              | Yes                       | N/A                                                            | Yes                                                   | No  | No  | No conflict | N/A                                 | Yes | Yes | Yes | Yes | Yes                                      |
| <i>Lagos-Gallego, 2017</i> | No                                 | No | No                                          | Universidad Tecnológica de Pereira    | Yes                                                              | No, used ICD-10 codes     | Yes                                                            | N/A                                                   | Yes | No  | No conflict | N/A                                 | Yes | Yes | Yes | Yes | Yes                                      |
| <i>Darwish, 2020</i>       | No                                 | No | N/A                                         | Unknown                               | Yes                                                              | No, used diagnostic codes | N/A                                                            | N/A                                                   | N/A | No  | No conflict | N/A                                 | Yes | Yes | Yes | Yes | No. They did not have a comparison group |
| <i>Oltrogge, 2020</i>      | Yes                                | No | N/A                                         | N/A                                   | Yes                                                              | No, used diagnostic codes | Yes                                                            | N/A                                                   | Yes | Yes | No conflict | Yes, based on free-text EMR entries | Yes | Yes | Yes | Yes | Yes                                      |
| <i>Dalheez, 2020</i>       | N/A                                | No | N/A                                         | Unknown                               | Yes (random)                                                     | N/A                       | Yes                                                            | N/A                                                   | N/A | N/A | Unknown     | Yes                                 | Yes | Yes | Yes | No  | No. They did not                         |

|                             |     |    |                                                                               |                                                               |                                  |                           |     |     |     |     |             |     |     |     |     |     |                            |
|-----------------------------|-----|----|-------------------------------------------------------------------------------|---------------------------------------------------------------|----------------------------------|---------------------------|-----|-----|-----|-----|-------------|-----|-----|-----|-----|-----|----------------------------|
|                             |     |    |                                                                               |                                                               | sampling with 82% response rate) |                           |     |     |     |     |             |     |     |     |     |     | have a comparison on group |
| <i>Sengoren Dikis, 2020</i> | N/A | No | Yes, Turkish citizens versus Syrian refugees, smaller sample size of refugees | Unknown                                                       | Yes                              | No, used diagnostic codes | Yes | N/A | N/A | N/A | No conflict | N/A | Yes | Yes | Yes | Yes | Yes                        |
| <i>Hoffman, 2021</i>        | Yes | No | N/A                                                                           | University of Minnesota, NIH Child Health & Human Development | Yes                              | Yes                       | N/A | N/A | Yes | Yes | No conflict | Yes | Yes | Yes | Yes | Yes |                            |

### Cochrane Tool for risk of bias assessment of randomized clinical trials

| Study              | Is the case definition adequate? | Representativeness of the cases | Selection of Controls | Definition of Controls | Total | Comparability of cases and controls on the basis of the design or analysis | Ascertainment of exposure | Same method of ascertainment for cases and controls | Non-Response rate                             | Total | Total |
|--------------------|----------------------------------|---------------------------------|-----------------------|------------------------|-------|----------------------------------------------------------------------------|---------------------------|-----------------------------------------------------|-----------------------------------------------|-------|-------|
| <i>Saleh, 2018</i> | Yes                              | Yes                             | Yes                   | Yes                    | 4     | Disease and Population                                                     | Records and Surveys       | Yes                                                 | Low response rate (62.9%) to phone screenings | 3     | 7     |

### Joanna Briggs Institute (JBI) Critical Appraisal for Qualitative Studies

| Study                       | Questions | 1. Is there congruity between the stated philosophical perspective and the research methodology? | 2. Is there congruity between the research methodology and the research question or objectives? | 3. Is there congruity between the research methodology and the methods used to collect data? | 4. Is there congruity between the research methodology and the representation and analysis of data? | 5. Is there congruity between the research methodology and the interpretation of results? | 6. Is there a statement locating the researcher culturally or theoretically? | 7. Is the influence of the researcher on the research, and vice-versa, addressed? | 8. Are participants, and their voices, adequately represented? | 9. Is the research ethical according to current criteria or, for recent studies, and is there evidence of ethical approval by an appropriate body? | Were strategies to address incomplete follow up utilized? |
|-----------------------------|-----------|--------------------------------------------------------------------------------------------------|-------------------------------------------------------------------------------------------------|----------------------------------------------------------------------------------------------|-----------------------------------------------------------------------------------------------------|-------------------------------------------------------------------------------------------|------------------------------------------------------------------------------|-----------------------------------------------------------------------------------|----------------------------------------------------------------|----------------------------------------------------------------------------------------------------------------------------------------------------|-----------------------------------------------------------|
| <i>Rossi et al., 2009</i>   |           | Yes                                                                                              | Yes                                                                                             | Yes                                                                                          | No                                                                                                  | Yes                                                                                       | No                                                                           | No                                                                                | No                                                             | Yes                                                                                                                                                | No                                                        |
| <i>Santoro et al., 2016</i> |           | Yes                                                                                              | Yes                                                                                             | Yes                                                                                          | Yes                                                                                                 | Yes                                                                                       | No                                                                           | No                                                                                | No                                                             | Yes                                                                                                                                                | No                                                        |
| <i>Maher et al., (2012)</i> |           | Yes                                                                                              | Yes                                                                                             | Yes                                                                                          | No                                                                                                  | Yes                                                                                       | No                                                                           | No                                                                                | No                                                             | Yes                                                                                                                                                | No                                                        |
